# Supplementary material for: Direct dynamics in a proton transfer reaction of isomer product competition. Insight into the suppressed formation of the isoformyl cation
Source: Royal Society of Chemistry journal article supplement (doi:10.1039/d0cp06516a), 2021-01-01
Supplement: d0cp06516a1.pdf [file d0cp06516a1.pdf]

**Direct Dynamics in a Proton Transfer Reaction of Isomer Product Competition.**

**Insight into the Suppressed Formation of Isoformyl cation**

Yujie Wang,<sup>§,a</sup> Siwei Zhao,<sup>§,a</sup> Xu Liu,<sup>a</sup> Wenqing Zhen,<sup>a</sup> Gang Fu,<sup>a</sup> and Li Yang,<sup>\*,a</sup>

Saozeng Sun,<sup>\*,b</sup> Jiaxu Zhang<sup>\*,a</sup>

<sup>a</sup>MIT Key Laboratory of Critical Materials Technology for New Energy Conversion  
and Storage, School of Chemistry and Chemical Engineering, State Key Laboratory  
of Advanced Welding and Joining,

<sup>b</sup>School of Energy Science and Engineering,

Harbin Institute of Technology, Harbin 150001, P. R. China

Author E-mail Address: yangli2014@hit.edu.cn, sunsz@hit.edu.cn, and

zhjx@hit.edu.cn

<sup>§</sup>Yujie Wang and Siwei Zhao contributed equally to this work.

Table S1. Electronic structure theory energies for stationary points on the HOCO<sup>+</sup> + CO PES with different methods<sup>a,b</sup> 修改

| Species                                 | MP2    | M06    | B3LYP  | M06-2X | BhandH | PBE0   | B97-1  | CCSD(T)/CBS | CCSD <sup>c</sup> | Expt <sup>d</sup> |
|-----------------------------------------|--------|--------|--------|--------|--------|--------|--------|-------------|-------------------|-------------------|
| CO <sub>2</sub> ···HCO <sup>+</sup>     | -131.0 | -121.3 | -119.2 | -105.9 | -130.1 | -124.3 | -119.7 | -115.5      |                   |                   |
|                                         | -125.1 | -127.2 | -115.1 | -101.3 | -125.5 | -120.1 | -115.5 | -109.6      | -102.1            |                   |
| CO <sub>2</sub> ···HOC <sup>+</sup>     | -43.5  | -58.2  | -53.1  | -51.9  | -70.3  | -53.1  | -52.3  | -49.8       |                   |                   |
|                                         | -39.7  | -55.2  | -50.2  | -50.2  | -68.2  | -51.0  | -49.8  | -46.0       | -40.6             |                   |
| [CO <sub>2</sub> ···H··CO] <sup>+</sup> | -11.3  | -11.3  | -10.0  | -11.7  | -18.4  | -11.7  | -12.1  | -10.5       |                   |                   |
|                                         | -9.6   | -10.0  | -8.8   | -10.5  | -16.7  | -10.5  | -10.9  | -8.8        | -5.0              |                   |
| HCO <sup>+</sup> +CO <sub>2</sub>       | -69.5  | -58.2  | -52.3  | -41.4  | -45.2  | -56.1  | -51.9  | -55.2       |                   |                   |
|                                         | -65.7  | -55.2  | -48.5  | -36.4  | -41.4  | -52.3  | -48.5  | -51.5       | -44.4             | -52.3             |
| HOC <sup>+</sup> +CO <sub>2</sub>       | 128.4  | 94.1   | 107.9  | 109.2  | 106.7  | 109.2  | 107.9  | 110.5       |                   |                   |
|                                         | 123.4  | 89.5   | 101.7  | 105.9  | 100.4  | 102.5  | 101.3  | 105.4       | 113.0             | 113.8             |

<sup>a</sup>Energies (in kJ mol<sup>-1</sup>) are with respect to the HOCO<sup>+</sup> + CO reactants without (upper values) and with (lower numbers) ZPE. <sup>b</sup>MP2 and DFT energies are calculated with the aug-cc-pVDZ basis set and the CCSD(T)/CBS calculations based on the MP2 minimum geometries. <sup>c</sup>Energies from ref. 22 include ZPE at the CCSD/6-311++G(d,p) level. <sup>d</sup>Experimental data are from ref. 22,34.

Table S2. Averaged fractions of  $\text{HOCO}^+ + \text{CO} \rightarrow \text{HCO}^+ + \text{CO}_2$  product energy partitioning<sup>a</sup>

|       | $\text{HCO}^+$    |                   | $\text{CO}_2$     |                   | $f_{\text{rel}}'$ | $f_{\text{int}}'$ |
|-------|-------------------|-------------------|-------------------|-------------------|-------------------|-------------------|
|       | $f_{\text{rot}}'$ | $f_{\text{vib}}'$ | $f_{\text{rot}}'$ | $f_{\text{vib}}'$ |                   |                   |
| DR    | 0.22±0.04         | 0.19±0.03         | 0.18±0.03         | 0.09±0.02         | 0.32±0.04         | 0.68±0.04         |
| DS    | 0.15±0.02         | 0.16±0.01         | 0.10±0.01         | 0.06±0.01         | 0.53±0.02         | 0.47±0.02         |
| Ind   | 0.14±0.07         | 0.33±0.11         | 0.31±0.10         | 0.20±0.08         | 0.02±0.01         | 0.98±0.01         |
| Total | 0.16±0.01         | 0.17±0.01         | 0.12±0.01         | 0.07±0.01         | 0.48±0.02         | 0.52±0.02         |

<sup>a</sup>The  $f$ 's are fractions of energy partitioned to rotational, vibrational, relative translational, and internal (rotation + vibration) energy. Results are reported for the individual direct rebound (DR), direct stripping (DS), indirect (Ind) mechanisms, and for the total reaction.

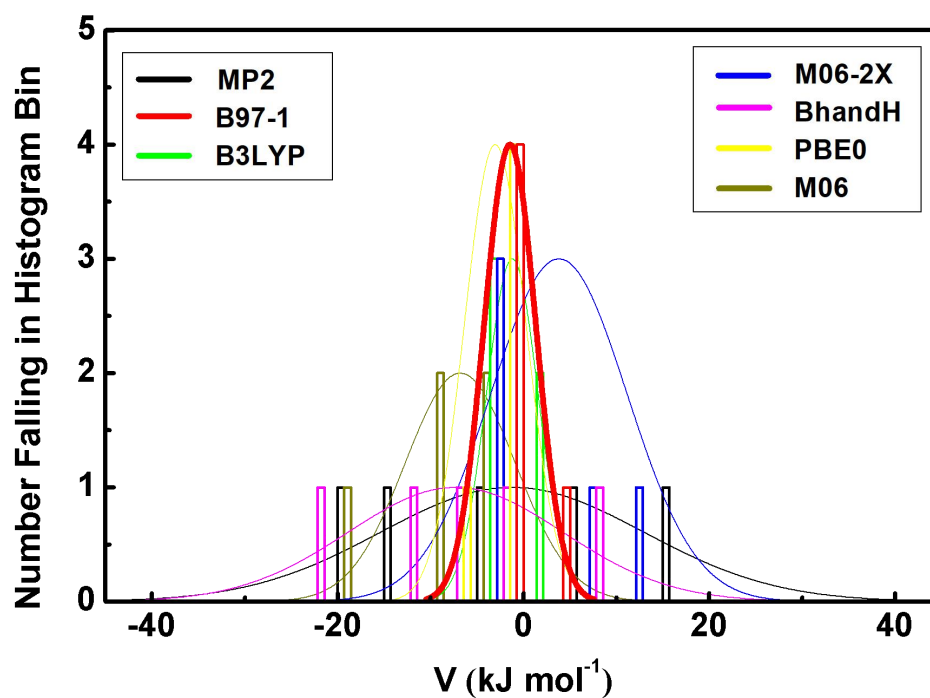

Figure S1. Histograms of differences between stationary point energies calculated with MP2 and DFT functionals, employing the aug-cc-pVDZ basis set, and the CCSD(T)/CBS values. All stationary point energies are included in each of the histograms and each is fit with the normal distribution of error curve with the fitting parameters given in the text.



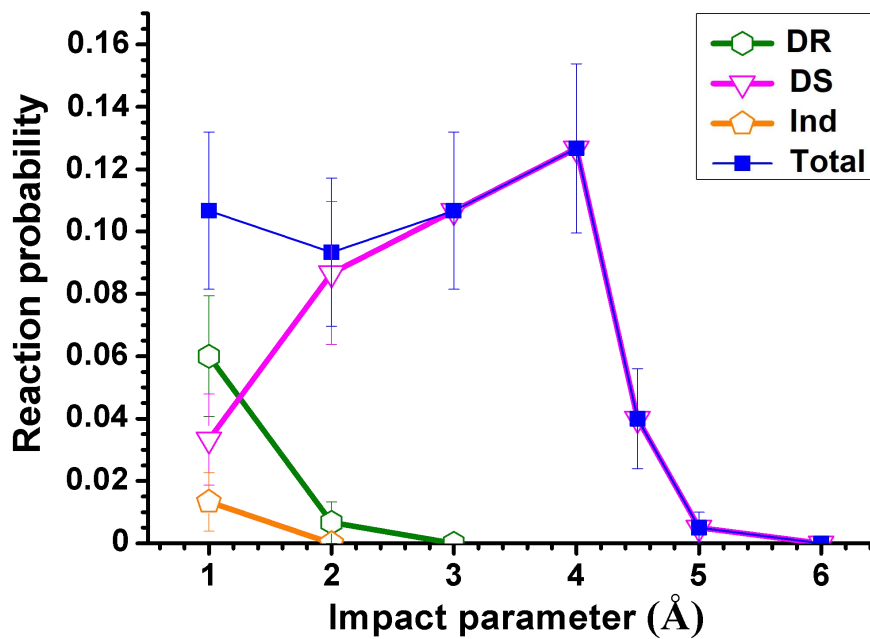

Figure S3. Reaction probability  $P_i(b)$  of  $\text{HOCO}^+ + \text{CO} \rightarrow \text{HCO}^+ + \text{CO}_2$  reaction channel as a function of impact parameter  $b$  at a 2.35eV collision energy. Results are shown for the three identified atomic-level reaction mechanisms and for the total reaction: direct rebound (green), direct stripping (pink), indirect (orange), and total (blue).

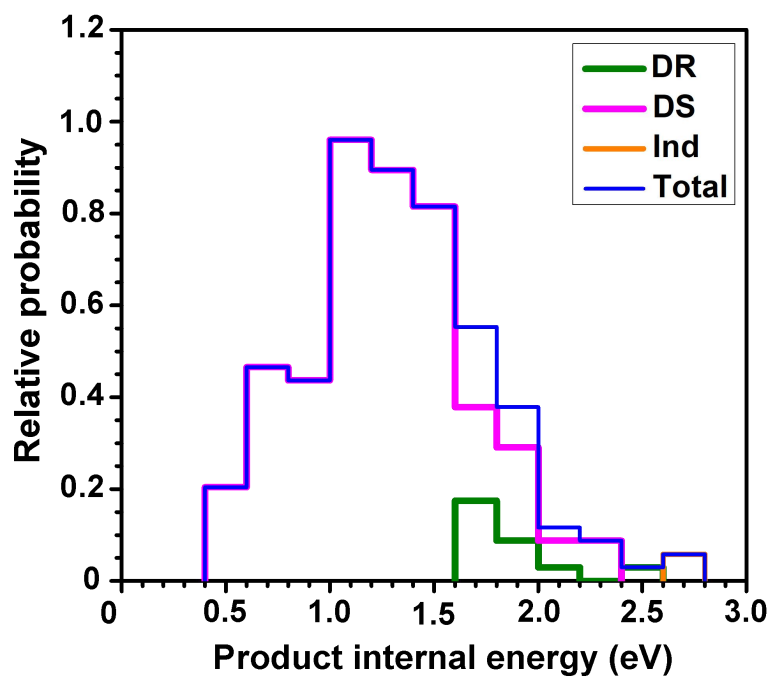

Figure S4. Product internal energy distributions of the proton transfer reaction  $\text{HOCO}^+ + \text{CO} \rightarrow \text{HCO}^+ + \text{CO}_2$ . Results are presented for the direct rebound (green), the direct stripping (pink), and the indirect (orange) atomic-level mechanisms, as well as for the total scattering (blue).

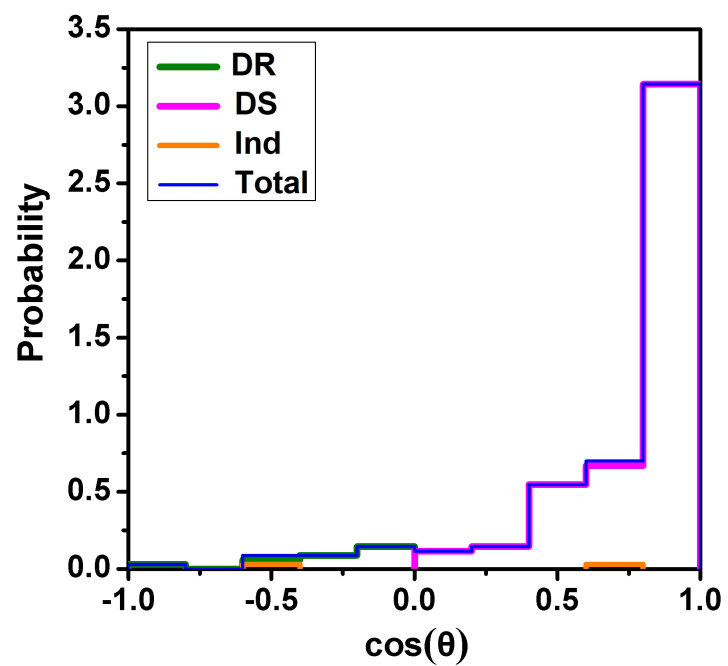

Figure S5. Velocity scattering angle distributions for the  $\text{HOCO}^+ + \text{CO} \rightarrow \text{HCO}^+ + \text{CO}_2$  reaction. The results are illustrated for the individual direct rebound (green), direct stripping (pink), and indirect (orange) mechanisms and for the total scattering (blue).



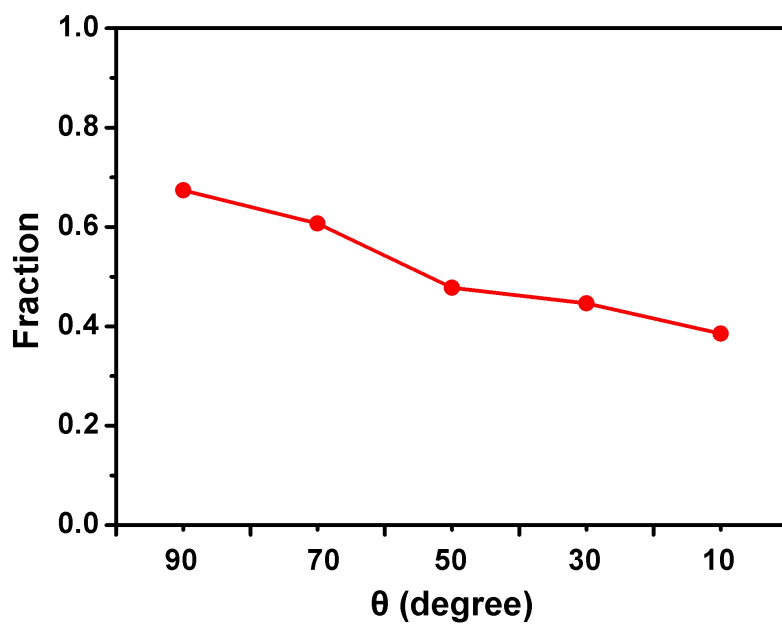

Figure S6. Fraction of product internal energy as a function of scattering angle for the  $\text{HOCO}^+ + \text{CO} \rightarrow \text{HCO}^+ + \text{CO}_2$  reaction.
